# Supplementary material
Source: Springer Nature journal article supplement (https://www.springermedizin.de/resource/supplementary/13023_2006_24_MOESM5_ESM.pdf/9641476)

**Figure 5: COX-2 gene expression in normal and HP fibroblasts exposed to PLP and/or CPPD**

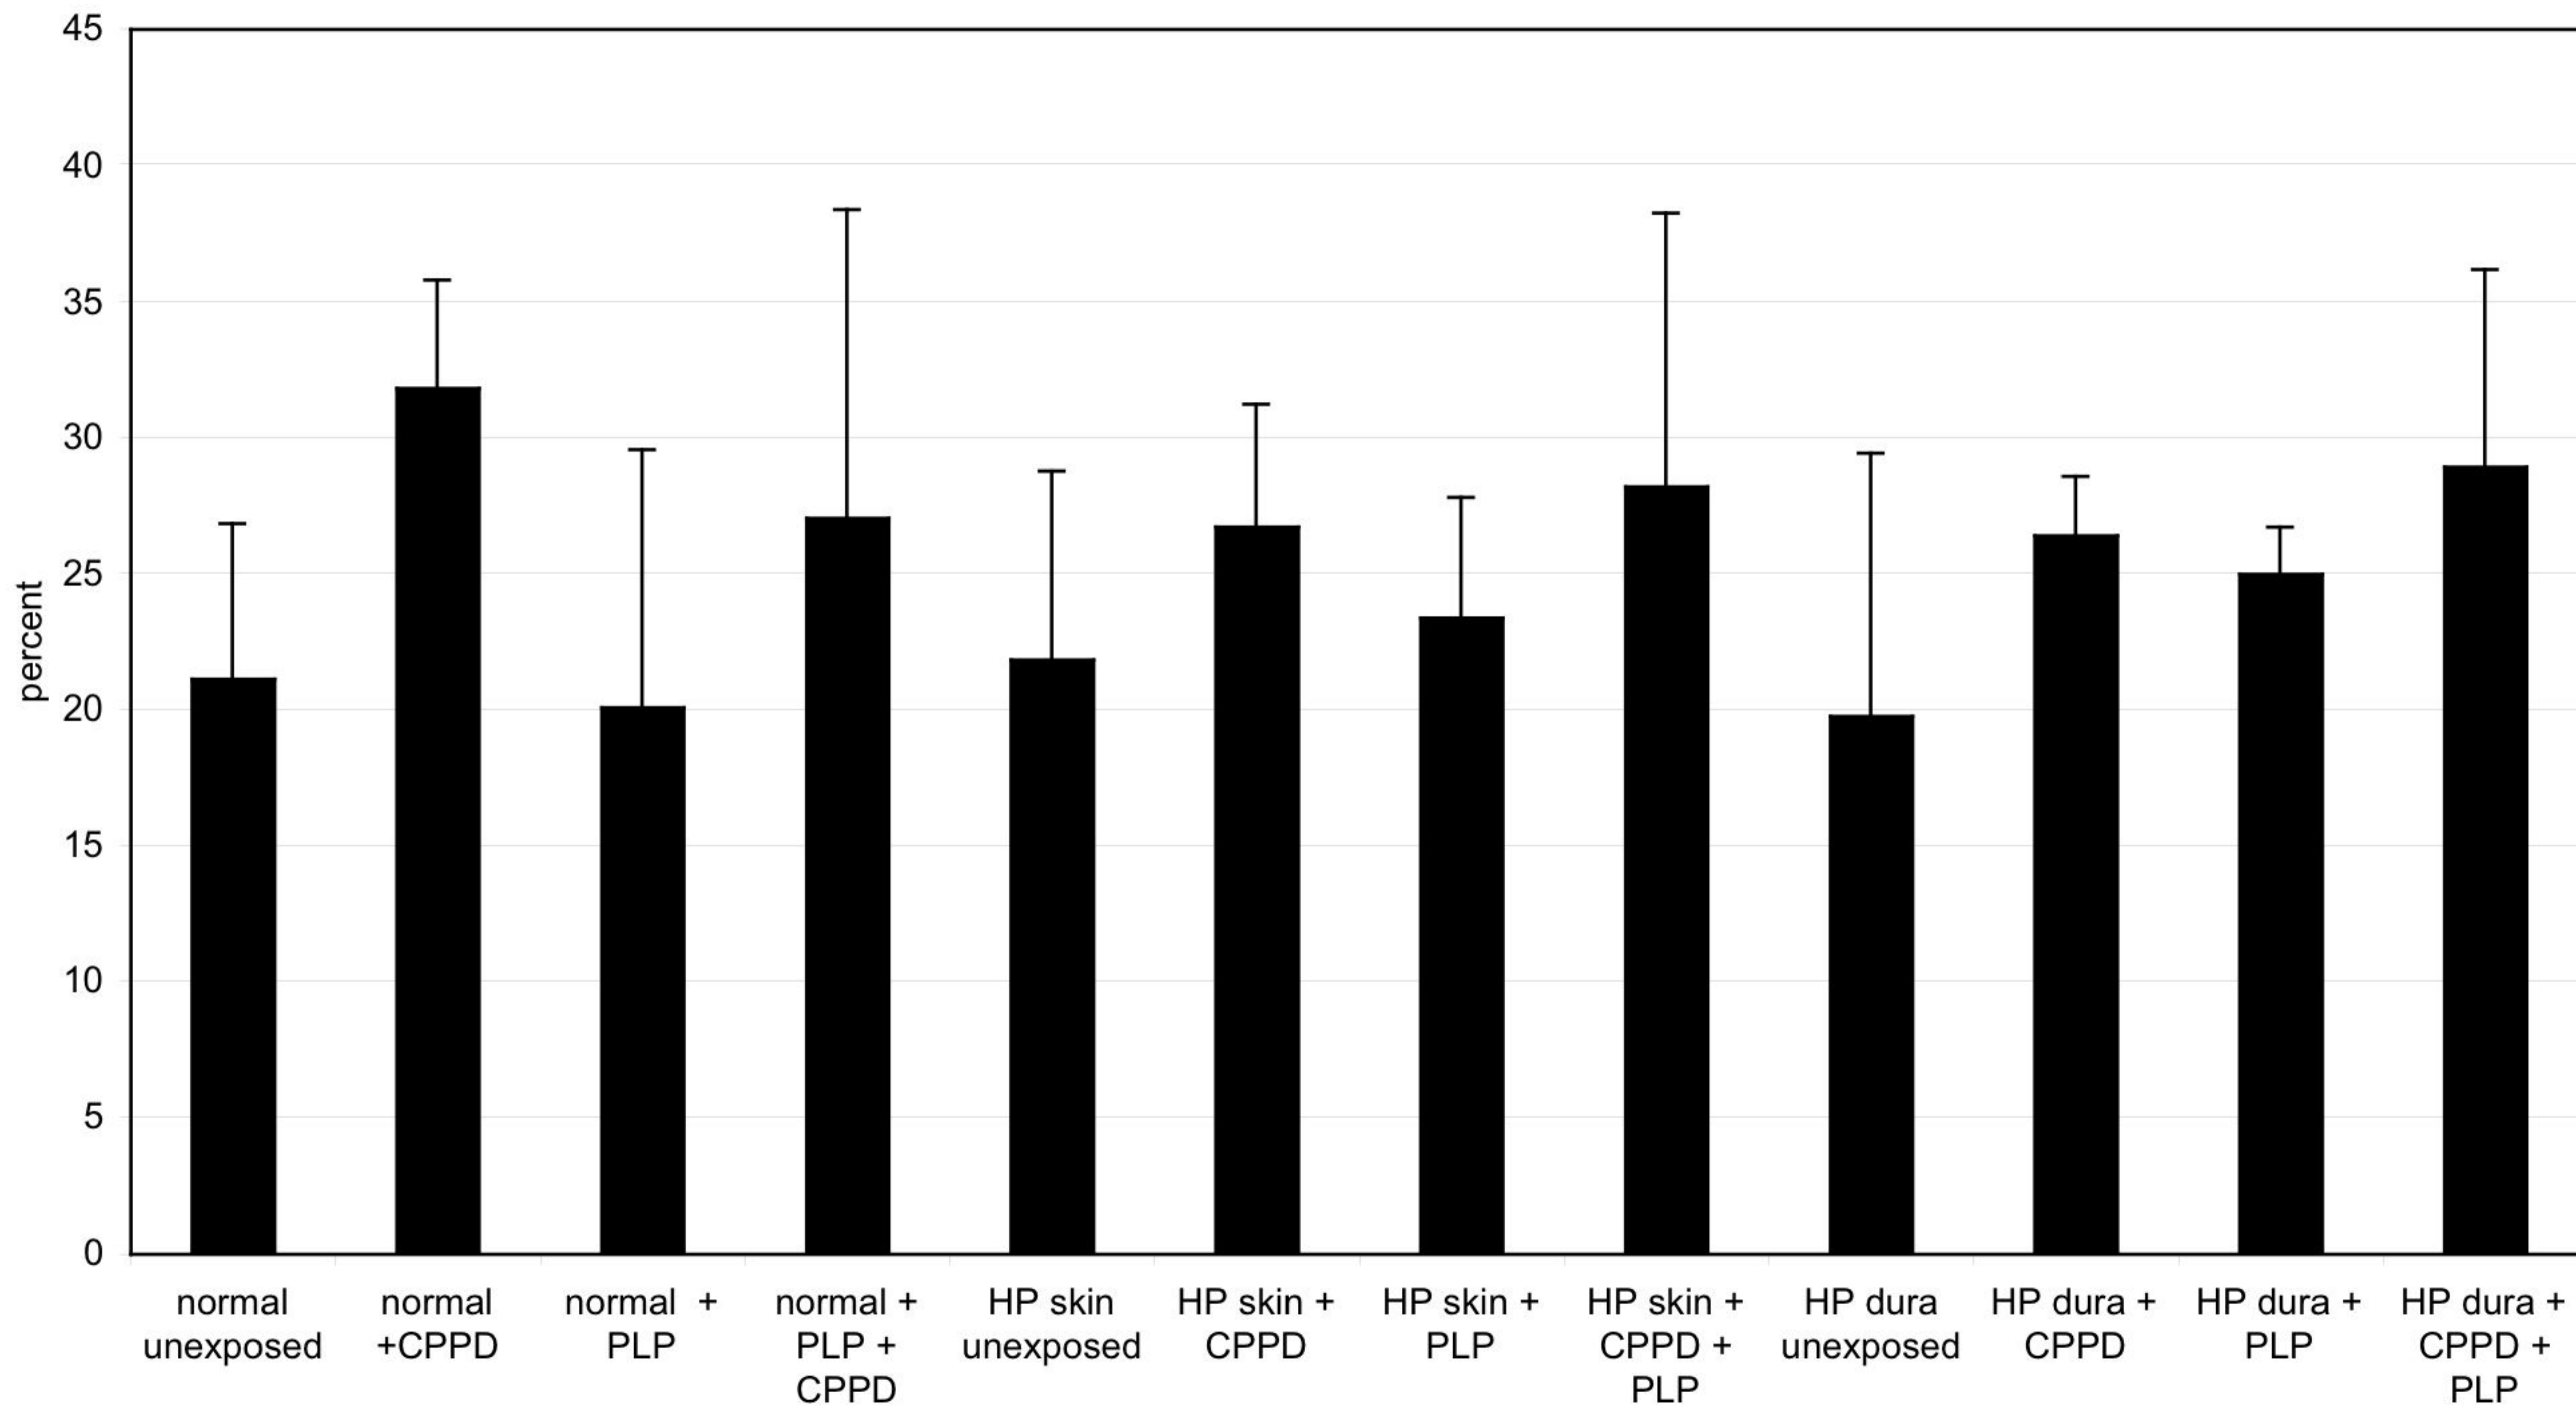

Supplement: MOESM5 [file 9641476]
